# Supplementary material for: β-Glucan reprograms alveolar macrophages via neutrophil/IFNγ axis in a murine model of lung injury
Source: eLife. 2025 Jul 8;13:RP102068. doi: 10.7554/eLife.102068 (PMC12237401; doi:10.7554/eLife.102068)
Supplement: Figure 1—figure supplement 1—source data 1. [file elife-102068-fig1-figsupp1-data1.xlsx]

## Sheet: B
	Ctrl
d.p.i	A1	%	A2	%	A3	%	A4	%	A5	%	A6	%	A7	%	A8	%	A9	%	A10	%
0	17.64	100	15.55	100	17.34	100	17.87	100	16.86	100	16.97	100	17.55	100	17.66	100	18.02	100	15.7	100
1	15.67	88.8322	13.95	89.7106	15.08	86.9666	17.03	95.2994	15.47	91.7556	16.62	97.9375	17.02	96.9801	16.32	92.4122	18	99.889	13.54	86.242
2	15.93	90.3061	14.03	90.2251	14.58	84.083	17.05	95.4113	16.03	95.0771	16.78	98.8804	16.43	93.6182	17.32	98.0747	18.52	102.775	13.76	87.6433
3	16.64	94.3311	15.03	96.6559	15.15	87.3702	17	95.1315	16.66	98.8138	17.4	102.534	16.91	96.3533	17.31	98.0181	18.66	103.552	14.73	93.8217
4	17.53	99.3764	15.94	102.508	16.43	94.752	17.51	97.9855	17.15	101.72	17.32	102.062	17.51	99.7721	17.7	100.227	18.97	105.272	15.49	98.6624
5
6
7
8
9
10
11
12
13
14
15
16
17
18
19
20
	Betaglucan
d.p.i	B1	%	B2	%	B3	%	B4	%	B5	%	B6	%	B7	%	B8	%	B9	%	B10	%
0	18.01	100	18.02	100	16.45	100	17.08	100	18.06	100	20.21	100	18.78	100	19.67	100	15.66	100	18.63	100
1	17.34	96.2798	16.24	90.1221	15.25	92.7052	14.5	84.8946	17.64	97.6744	19.12	94.6066	17.83	94.9414	17.74	90.1881	13.93	88.9527	18.35	98.497
2	17.32	96.1688	16.54	91.7869	16.04	97.5076	15.66	91.6862	18	99.6678	18.7	92.5285	18.04	96.0596	17.73	90.1373	13.9	88.7612	17.94	96.2963
3	17.63	97.8901	17.03	94.5061	16.46	100.061	16.32	95.5504	18.12	100.332	18.78	92.9243	18.49	98.4558	18.2	92.5267	14.27	91.1239	18.63	100
4	17.79	98.7785	17.28	95.8935	16.97	103.161	16.51	96.6628	18.26	101.107	19.1	94.5077	18.67	99.4143	18.52	94.1535	14.66	93.6143	18.68	100.268
5
6
7
8
9
10
11
12
13
14
15
16
17
18
19
20
