# Supplementary material for: β-Glucan reprograms alveolar macrophages via neutrophil/IFNγ axis in a murine model of lung injury
Source: eLife. 2025 Jul 8;13:RP102068. doi: 10.7554/eLife.102068 (PMC12237401; doi:10.7554/eLife.102068)
Supplement: Figure 1—figure supplement 2—source data 1. [file elife-102068-fig1-figsupp2-data1.xlsx]

## Sheet: A
	Control		4h post-LPS
	Control	β-glucan	Control	β-glucan
	0.7	0.2	11.4	11.3
	0.1	0.2	15.4	8.1
	0.2	0.9	5.6	8.4
	0.5	0.4	2.7	4.1

## Sheet: B
	F4/80			CD169			CD64			CD80
	Control	β-glucan		Control	β-glucan		Control	β-glucan		Control	β-glucan
	39.6	53.9		43.7	58.9		21	29.9		1.37	1.77
	58.9	63.9		62.9	70.2		36.1	29.6		1.54	1.26
	38.9	48.3		45.1	52.7		26.8	27.5		1.26	1.65
	43.8	32.6		49.1	37.3		26.1	17.3		1.16	1.48
	57.4	34.3		65.1	39.9		30.6	17.4		1.01	1.89
