# Supplementary material for: β-Glucan reprograms alveolar macrophages via neutrophil/IFNγ axis in a murine model of lung injury
Source: eLife. 2025 Jul 8;13:RP102068. doi: 10.7554/eLife.102068 (PMC12237401; doi:10.7554/eLife.102068)
Supplement: Figure 1—figure supplement 3—source data 1. [file elife-102068-fig1-figsupp3-data1.xlsx]

## Sheet: B
	Ctrl PBS	Ctrl B-glucan	H24 PBS	H24 B-glucan
	78	35	221	461
	52	70	328	469
	32	36	374	453
	31	30	275	456
	47	22	313	428
			383	467
			143	413
			337	406
			275	401

## Sheet: D
	CXCL1					IL-6					TNFa
	Ctrl PBS	Ctrl B-glucan	H4 PBS	H4 B-glucan		Ctrl PBS	Ctrl B-glucan	H4 PBS	H4 B-glucan		Ctrl PBS	Ctrl B-glucan	H4 PBS	H4 B-glucan
	48	123	499	2529		0	0	371	397		0	0	1050	5015
	31	138	2405	2143		0	0	459	869		0	0	4507	6473
	120	255	1844	4475		67	117	122	997		0	0	2000	17683
	145	134	528	3843				331	866		0	0	208	14665
			3187	4600				236	207				2681	1540

## Sheet: E
	%					#
	Ctrl PBS	Ctrl B-glucan	H4 PBS	H4 B-glucan		Ctrl PBS	Ctrl B-glucan	H4 PBS	H4 B-glucan
	2.51	1.47	82.4	90.2		1280	1397	89964	139064
	0.95	0.44	76.8	91.8		808	365	61440	193440
	1.16	0.97	43.1	93		568	359	67568	144302
	0.61	0.22	52.4	93		403	202	55632	159200
	0.26	0.21				148	116

## Sheet: F
		%					#
		Ctrl PBS	Ctrl B-glucan	H4 PBS	H4 B-glucan		Ctrl PBS	Ctrl B-glucan	H4 PBS	H4 B-glucan
		48.2	61	3.38	4.02		24582	57950	4867	5306
		48.9	53.6	9.71	2.66		41565	44488	7768	2607
		64.2	43.3	3.74	2.48		31458	16021	3067	5158
		68.4	55.3	0.86	23.1		45144	50876	585	55902
		33	59.6				18810	32780
