# Supplementary material for: β-Glucan reprograms alveolar macrophages via neutrophil/IFNγ axis in a murine model of lung injury
Source: eLife. 2025 Jul 8;13:RP102068. doi: 10.7554/eLife.102068 (PMC12237401; doi:10.7554/eLife.102068)
Supplement: Figure 1—figure supplement 4—source data 1. [file elife-102068-fig1-figsupp4-data1.xlsx]

## Sheet: B
	CXCL1					TNFa
	Ctrl PBS	Ctrl B-glucan	H4 PBS	H4 B-glucan		Ctrl PBS	Ctrl B-glucan	H4 PBS	H4 B-glucan
	0	0	3334	3150		0	0	3049	4397
	0	0	3511	3526		0	0	3107	3845
		0	2586	3840				3432	3486
			2915	4525				2797	4064
			2761	4386				2516	4335
