# Supplementary material for: β-Glucan reprograms alveolar macrophages via neutrophil/IFNγ axis in a murine model of lung injury
Source: eLife. 2025 Jul 8;13:RP102068. doi: 10.7554/eLife.102068 (PMC12237401; doi:10.7554/eLife.102068)
Supplement: Figure 1—figure supplement 5—source data 1. [file elife-102068-fig1-figsupp5-data1.xlsx]

## Sheet: B
	Ctrl PBS	Ctrl B-glucan	H24 PBS	H24 B-glucan
	78	35	100.35	220
	52	70	101.75	146
	32	36	77	129
	31	30	48.4	77
	47	22	47.7	86
			38	122
			83	150
			60	70

## Sheet: D
	CXCL1					IL-6					TNFa
	Ctrl PBS	Ctrl B-glucan	H4 PBS	H4 B-glucan		Ctrl PBS	Ctrl B-glucan	H4 PBS	H4 B-glucan		Ctrl PBS	Ctrl B-glucan	H4 PBS	H4 B-glucan
	25.011	12.26	47.86	363.57		7.63	3.32	34.07	123		20	0	20	0
	55.6	16.77	58	267.91		0	0	102.58	172.71		0	3.4	0	3.4
	18.36	15.12	27.5	153.88		15.73	7.08	30.56	77.76		59	15	5.93	15
	31.83	26.4	32	120.06		31.91	0	28	234.95		32	70	59	70
	28	24	49	310		11	11	40	151		80	40	80	40
	34	22	60	271		27	5	52	200		40	60	40	60
			24	158			14	80	183			20	45	20
			55	125				70	137				60	50
			25										70

## Sheet: E
	%					#
	Ctrl PBS	Ctrl B-glucan	H4 PBS	H4 B-glucan		Ctrl PBS	Ctrl B-glucan	H4 PBS	H4 B-glucan
	0	0.068	0.31	1.86		0	1	5	139
	0	0.094	0.12	1.96		0	2	2	0
	0	0	0.22	1.71		0	0	4	31
	0.19	0.022	0.42	0.24		2	1	7	27
	0.11	0	0	0.66		2	0	0	9
	0.19	0	0.77	0.6		1	0	42	38
	0.082	0.018	1.14				1	3	44
			0.17					15	33
			0.051					4
			0.51					0

## Sheet: F
	%					#
	Ctrl PBS	Ctrl B-glucan	H4 PBS	H4 B-glucan		Ctrl PBS	Ctrl B-glucan	H4 PBS	H4 B-glucan
	17.3	54.5	58.4	35.7		277	870	934	571
	71	66.8	45.7	41.1		1136	1069	731	658
	45.4	76.4	86.7	21.5		726	1222	1387	344
		68.8	27.7	21.7		798	1101	443	347
	40.7	38.9		69.8		170	622	299	5444
	15.9	21.9	45.2	54		260	280	2486	6264
	35.6	25.3	58.1	39.3			281	2440	5816
			66.5	28.2				5719	3130
			51.1					4292
			46.8					3042
