# Supplementary material for: β-Glucan reprograms alveolar macrophages via neutrophil/IFNγ axis in a murine model of lung injury
Source: eLife. 2025 Jul 8;13:RP102068. doi: 10.7554/eLife.102068 (PMC12237401; doi:10.7554/eLife.102068)
Supplement: Figure 1—source data 1. [file elife-102068-fig1-data1.xlsx]

## Sheet: 1B
	Ctrl PBS	Ctrl B-glucan	H24 PBS	H24 B-glucan		Ctrl PBS	Ctrl B-glucan	H24 PBS	H24 B-glucan
	20	18.8	60	73		-626	-634	-438.2	-317.7
	21.2	25	48	74		-617	-597	-405.3	-392.6
	20.02	26.6	64.8	87		-624	-587	-420.6	122
			42.2	91				-512.5	123
			43.3	83				-519.8	133

## Sheet: 1C
	Ctrl PBS	Ctrl B-glucan	H24 PBS	H24 B-glucan
	78	35	162.904	294.631
	52	70	101.356	341.971
	32	36	87.8773	254.994
	31	30	275.974	330.617
	47	22	116.294	258.911

## Sheet: 1E
	%					#
	Ctrl PBS	Ctrl B-glucan	H4 PBS	H4 B-glucan		Ctrl PBS	Ctrl B-glucan	H4 PBS	H4 B-glucan
	1.54	0.45	35.5	79.3		785	427	3024	104676
	0	0.18	67	66.5		0	149	28400	65170
	0.25	0.13	26.8	86.1		122	48	54940	179088
	0.29	0.072	19.8	74.5		165	39	18224	180290
								11286	81721

## Sheet: 1F
	Ctrl PBS	Ctrl B-glucan	H4 PBS	H4 B-glucan
	15	27	580	960
	6	47	75.627	336.753
	23	11	187.176	814
	33	8	370	852
	37	21	640	1320

## Sheet: 1G
	Ctrl PBS	Ctrl B-glucan	H4 PBS	H4 B-glucan
	0	9.8473	82.5516	254.257
	0	0	128.959	153.709
	0	0	127.412	234.148
	56	74	105.755	145.975
	0	0		162.99

## Sheet: 1H
	Ctrl PBS	Ctrl B-glucan	H4 PBS	H4 B-glucan
	65	90	129.327	1334.05
	51	61	688.422	761.637
	4	53	342.316	908.067
			695.078	788.261
			242.477	388.907

## Sheet: 1I
	%
	Ctrl PBS	Ctrl B-glucan	H4 PBS	H4 B-glucan		Ctrl PBS	Ctrl B-glucan	H4 PBS	H4 B-glucan
	28.1	27.3	6.7	7.02		14331	53865	63216	9266
	68.8	33.6	9.07	12.6		58480	22659	5360	12348
	46	58.5	8.24	3.61		22540	12432	7437	5262
	45.9	56.7	33.2	4.27		26163	32175	5603	8736
								18924	5636
