# Supplementary material for: β-Glucan reprograms alveolar macrophages via neutrophil/IFNγ axis in a murine model of lung injury
Source: eLife. 2025 Jul 8;13:RP102068. doi: 10.7554/eLife.102068 (PMC12237401; doi:10.7554/eLife.102068)
Supplement: Figure 2—source data 1. [file elife-102068-fig2-data1.xlsx]

## Sheet: 2B
	Vehicle Control	Vehicle BG Control	Clodronate control	Clodronate BG Control	Vehicle LPS	Vehicle BG LPS	Clodronate LPS	Clodronate BG LPS
	70	48	68	73	170	200	53	110
	35	85	58	38	158	262	44	63
	90	68	35	56	214	242	80	89
			55	51	190	226	78	82
				61	200	234
						233

## Sheet: 2C
	%					#
	Vehicle PBS	Vehicle BG	Clodronate PBS	Clodronate BG		Vehicle PBS	Vehicle BG	Clodronate PBS	Clodronate BG
	29	82.2	63.3	21.4		21112	32400	27125	12847
	18	77.7		41		11020	64116	36714	8132
	53	78.2	30.9	46.8		7560	66045	25956	12710
	17.9	65.5	53	40.7		28934	46110	17490	26676
	40.6	67.5	77.5	44.3		33600	30785	13085	33781
	51.5	67.2	69.6	25.3		8292	13580	2675	8147
	39	67.9	44	38.1		4134	40860	5467	14478
	16	22.7	38.5	32.2		2384	6086	15288	7857
			54.6	25					3850
				59.4					5800

## Sheet: 2D
	CXCL1					IL-6					TNFa
	Vehicle PBS	Vehicle BG	Clodronate PBS	Clodronate BG		Vehicle PBS	Vehicle BG	Clodronate PBS	Clodronate BG		Vehicle PBS	Vehicle BG	Clodronate PBS	Clodronate BG
	498	2636	44	186		129.9	596	263	93		1590	4527	3766	2274
	1490	1252	85.4	127		97.1	740	200	503		878	10482	4673	387
	846	2366	102.7	162		235	451	97.5	180		2743	9885	814	441
	1240	3389	384.7	161		1757	2922	322	56.5		5483	6048	665	633
	1940	3648	289.9	387.5		1518	1579	938	981		5994	7066	1475	4740
	859	4721	379	417.2		1020	1226	358	752		4269	12710	2681	1737
	2070	3370	432.6	700		1233	2195	269	1108		6119	8596	3793	1137
	2235	4886	349.7	400.3		1101	1814	1016	1140		5941	8347	3904	2668
	839		489	451.9				716					2485
			262.8

## Sheet: 2F
	Ctrl PBS	Ctrl B-glucan	H4 PBS	H4 B-glucan
	890	946	618	972
	900	777	775	713
	999	970	663	1103
			892	831

## Sheet: 2G
		%					#
		Ctrl PBS	Ctrl B-glucan	H4 PBS	H4 B-glucan		Ctrl PBS	Ctrl B-glucan	H4 PBS	H4 B-glucan
		0	0.014	3.48	5.06		2173	896	3932	5414
		0.023	0.021	2.5	1.94		1856	1302	2475	14758
		0.4	0.3	1.64	2.75		83	228	1706	3080
				1.45	1.25				7000	1750

## Sheet: 2H
		CXCL1					IL-6					TNFa
		Ctrl PBS	Ctrl B-glucan	H4 PBS	H4 B-glucan		Ctrl PBS	Ctrl B-glucan	H4 PBS	H4 B-glucan		Ctrl PBS	Ctrl B-glucan	H4 PBS	H4 B-glucan
		61	0	449	472.3		0	0	0	168		0	0	182.6	302
		0	0	372.5	518.7		0	0	0	0		0	132	111.4	172
		0	0	375.6	475.8		0	0	95	82		40	21	151.1	204.3
				292.7	191.9				0	0				128	460

## Sheet: 2J
	AM ip PBS c	AM ip bglu c	AM ip LPS H4	AM ip bglu H4
	890	946	769	1538
	999	777	708	1106
	999		998	1351
	970		640	1205
	900		943
			618

## Sheet: 2K
		%					#
		AM ip PBS c	AM ip bglu c	AM ip LPS H4	AM ip bglu H4		AM ip PBS c	AM ip bglu c	AM ip LPS H4	AM ip bglu H4
		1.94	0.014	2.51	23.2		2173	896	1782	21576
		1.45	0.021	13.2	9.05		1856	1302	5808	8507
		0		2.2	47.9		0		1034	60354
		0.023		5.91	36.9		83		3428	42435
		0.4		5.4			228		1998
				10.3					7416

## Sheet: 2L
	CXCL1					IL-6					TNFa
	AM ip PBS c	AM ip bglu c	AM ip LPS H4	AM ip bglu H4		AM ip PBS c	AM ip bglu c	AM ip LPS H4	AM ip bglu H4		AM ip PBS c	AM ip bglu c	AM ip LPS H4	AM ip bglu H4
	61	0	667	3664		0	0	0	709		0	0	88	4122
	0	0	3158	4750		0	0	0	0		0	132	158	7855
	0	0	0	3429		0	0	0	103		0		0	5174
			1093	3822		0	0	26	199				1249	4058
			3046			0							2666
			2178										4058
