# Supplementary material for: β-Glucan reprograms alveolar macrophages via neutrophil/IFNγ axis in a murine model of lung injury
Source: eLife. 2025 Jul 8;13:RP102068. doi: 10.7554/eLife.102068 (PMC12237401; doi:10.7554/eLife.102068)
Supplement: Figure 3—source data 1. [file elife-102068-fig3-data1.xlsx]

## Sheet: 3K
		CXCL1							TNFa
		PBS ctrl	BG ctrl	PBS H4 10ng/ml	BG H4 10ng/ml	PBS H4 50ng/ml	BG H4 50ng/ml		PBS ctrl	BG ctrl	PBS H4 10ng/ml	BG H4 10ng/ml	PBS H4 50ng/ml	BG H4 50ng/ml
		0	0	1698	3221	2727	3545		0	0	2180	7612	8560	11286
		0	0	1439	2997	2302	4522		0	0	7457	9276	5187	9811
		0	0	2289	2708	2114	3312		0	0	1500	9136	3564	10076

## Sheet: 3M
	Basal Respiration
		PBS						beta glucan
	Uns.	56.35	50.35	57.16				108.98	114.56	95.05
	LPS	46.9	42.35					86.5	80.26
	ATP production
		PBS						beta glucan
	Uns.	35.97	37	43.86				79.43	84.4	67.4
	LPS	29.95	31.16					56.14	60
	ECAR
		PBS						beta glucan
	Uns.	13	4	0.5				17.6	25	10
	LPS	13	12	16	12			26	17	21	26	42	11
	OCR
		PBS						beta glucan
	Uns.	71	82.3	85.9				147.3	162	133
	LPS	59	72	73	66			131	116	98	73	82	141
