# Supplementary material for: β-Glucan reprograms alveolar macrophages via neutrophil/IFNγ axis in a murine model of lung injury
Source: eLife. 2025 Jul 8;13:RP102068. doi: 10.7554/eLife.102068 (PMC12237401; doi:10.7554/eLife.102068)
Supplement: Figure 4—figure supplement 1—source data 1. [file elife-102068-fig4-figsupp1-data1.xlsx]

## Sheet: B
	CXCL1					IL-6					TNFa
	Ctrl PBS	Ctrl B-glucan	H4 PBS	H4 B-glucan		Ctrl PBS	Ctrl B-glucan	H4 PBS	H4 B-glucan		Ctrl PBS	Ctrl B-glucan	H4 PBS	H4 B-glucan
	0	0	1510	5104		0	0	134	402		0	129	1568	5017
	0	0	5575	8560		0	0	110	1740		0	0	2573	9440
		0	4123	6470			0	237	850			3	1426	7231
			3654	8347				528	777				3486	2405

## Sheet: C
	%					#
	Ctrl PBS	Ctrl B-glucan	H4 PBS	H4 B-glucan		Ctrl PBS	Ctrl B-glucan	H4 PBS	H4 B-glucan
	0.13	0.47	31.4	39.5		47	202	9420	15510
	0.26	0.04	21.4	32.5		125	20	6634	11455
		0.025	18.5	31.8			9	8325	15600
			17.5	33				4900	15232

## Sheet: D
	%					#
	Ctrl PBS	Ctrl B-glucan	H4 PBS	H4 B-glucan		Ctrl PBS	Ctrl B-glucan	H4 PBS	H4 B-glucan
	38.4	27.5	12.2	11.1		13820	11825	3660	5217
	32.2	37.5	17.3	13.1		15456	18750	5363	3799
		38.5	16.7	11.7			13860	7515	5616
			33.7	0.69				9436	166
