# Supplementary material for: β-Glucan reprograms alveolar macrophages via neutrophil/IFNγ axis in a murine model of lung injury
Source: eLife. 2025 Jul 8;13:RP102068. doi: 10.7554/eLife.102068 (PMC12237401; doi:10.7554/eLife.102068)
Supplement: Figure 4—figure supplement 3—source data 1. [file elife-102068-fig4-figsupp3-data1.xlsx]

## Sheet: B
	CXCL1					TNFa
	Ctrl PBS	Ctrl B-glucan	H4 PBS	H4 B-glucan		Ctrl PBS	Ctrl B-glucan	H4 PBS	H4 B-glucan
	0	0	625	1680		0	0	3846	8585
	0	0	670	1622		0	0	4300	4140
		0	653	1086				2279	8370
				1184					9575
