# Supplementary material for: β-Glucan reprograms alveolar macrophages via neutrophil/IFNγ axis in a murine model of lung injury
Source: eLife. 2025 Jul 8;13:RP102068. doi: 10.7554/eLife.102068 (PMC12237401; doi:10.7554/eLife.102068)
Supplement: Figure 4—source data 1. [file elife-102068-fig4-data1.xlsx]

## Sheet: 4B
	Ctrl PBS	Ctrl B-glucan	H24 PBS	H24 B-glucan
	8	27	145	136.4
	32	5	166	140
	40	50	200	154
			210	230

## Sheet: 4C
	%					#
	Ctrl PBS	Ctrl B-glucan	H24 PBS	H24 B-glucan		Ctrl PBS	Ctrl B-glucan	H24 PBS	H24 B-glucan
	0.69	0.52	51.9	86.3		166	150	16469	18025
	5.53	0.8	38.3	52		49	22	29500	18986
	0.2	2.5	82	72.1		78	92	23200	29342
			87.7	90.2				30000	40000
			79.8	88.4				29000	25000
			92	66				35000	43000

## Sheet: 4D
	CXCL1					IL-6					TNFa
	Ctrl PBS	Ctrl B-glucan	H24 PBS	H24 B-glucan		Ctrl PBS	Ctrl B-glucan	H24 PBS	H24 B-glucan		Ctrl PBS	Ctrl B-glucan	H24 PBS	H24 B-glucan
	0	0	1745	2836		0	0	873.5	1126		202	240	4348	5155
	0	4	3764	1941		0	0	804.5	507		127	118	7868	4412
	5	10	2200	3900		0	0	900	780		170	218	4812	5300
			4300	3100				720	960				3228	6880

## Sheet: 4F
	CXCL1					TNFa
	PBS ctrl	BG ctrl	PBS H4 50ng/ml	BG H4 50ng/ml		PBS c	BG c	PBS H4 50ng/ml	BG H4 50ng/ml
	0	0	4045	4896		0	0	3414	3400
	0	0	4526	4241		0	0	3574	3715
			4055	4563				3459	3495
			4245					3363
			3924					3367

## Sheet: 4H
	d0	d1	d3	d5
	0	13	0	0
	0	43	0	0
	0	29	0	0
	0	16	3	0

## Sheet: 4I
	%					#
	d0	d1	d3	d5		d0	d1	d3	d5
	0	0.11	0	0		0	53	0	0
	0	0.15	0	0.029		0	34	0	11
	0	0.032	0	0.048		0	21	18	15
	0		0.044	0.055		0	86	16	31
		0.26	0.091					46

## Sheet: 4J
	%					#
	d0	d1	d3	d5		d0	d1	d3	d5
	0.044	8	0.035	4.21		4048	917600	3640	260000
	0.44	21.5	1.02	0.41		26400	737600	128520	328380
	0.2	2.35	1.08	0.47		10000	3311000	185760	38540
	0.043	5.61	1.56	2.98		3096	545200	230880	59220
	0.35	6.2	1.68	1.3		8000	500980	226800	167800

## Sheet: 4L
	CXCL1									TNFa
	PBS				H4 PBS					PBS				H4 PBS
	Control	BG	anti-IFNy	anti-Ly6G	Control	BG	anti-IFNy	anti-Ly6G		Control	BG	anti-IFNy	anti-Ly6G	Control	BG	anti-IFNy	anti-Ly6G
	0	10	0	0	4090	4500	4000	4160		0	41	34	16	3111	4780	3100	3000
	20	11	5	43	4150	4460	4040	4060		12	7	0	28	3200	4690	3427	3198
	30	45	64	0	4080	4640	4050	3910		23	0	0	0	3355	4548	3380	3525
					4200	4600	4230	3920						3300	4622	3000	3150
					4010	4760	3880	4020						3750	4830	3300	3550
					4040	4340	4220	4220
